# Supplementary material for: Uneven spread of cis- and trans-editing aminoacyl-tRNA synthetase domains within translational compartments of P. falciparum
Source: PubMed Central journal article supplement — Sci Rep. 2011 Dec 12;1:188. doi: 10.1038/srep00188 (PMC3240968; doi:10.1038/srep00188), 2011-12-12
Supplement: srep00188-s1.pdf [file srep00188-s1.pdf]

**Supplementary Table S1 .** Complete inventory of compounds tested for their anti-parasitic activity. Code T-1 to T-11 represent set of compounds whose target was Pf-Ed-TRS, while A-1 to A-6 targeted Pf-Ed-ARS.

| Sr. No. | Code | IUPAC names                                                     | 2D structures                                                                         | Docking Score | IC <sub>50</sub> (μM) |
|---------|------|-----------------------------------------------------------------|---------------------------------------------------------------------------------------|---------------|-----------------------|
| 1.      | T1   | <b>N'-(2,3-dihydro-1H-1,5-benzodiazepin-4-yl)benzohydrazide</b> | 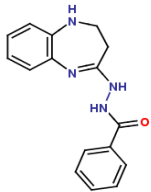   | -9.2          | >150                  |
| 2.      | T2   | <b>3-chloro-4-hydroxybenzaldehyde 1-phthalazinylhydrazone</b>   |   | -8.7          | ≈75                   |
| 3.      | T3   | <b>4-amino-6-methyl-3-(4-toluidino)-1,2,4-triazin-5(4H)-one</b> |  | -8.4          | >150                  |

|    |    |                                                                                            |                                                                                       |      |       |
|----|----|--------------------------------------------------------------------------------------------|---------------------------------------------------------------------------------------|------|-------|
| 4. | T4 | 7-[2-hydroxy-3-(3-toluidino)propyl]-1,3-dimethyl-3,7-dihydro-1H-purine-2,6-dione           | 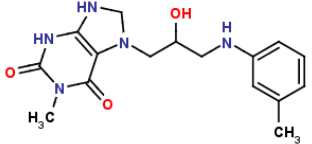   | -8.6 | >150  |
| 5. | T5 | 2-(2-cyclohexen-1-ylcarbonyl)-N-phenylhydrazinecarbothioamide                              |    | -8.4 | >150  |
| 6. | T6 | 2-(6-chloro-2-pyridinyl)-N-[3-(trifluoromethyl)phenyl]hydrazinecarboxamide                 |    | -8.8 | >150  |
| 7. | T7 | 5-[1-(4-fluorophenyl)-1H-tetrazol-5-yl]-4-(trifluoromethyl)pyrimidin-2-amine               |    | -8.8 | >150  |
| 8. | T8 | N'-{[(3-chloro-1-benzothien-2-yl)carbonyl]oxy}-5-methyl-1,2,4-oxadiazole-3-carboximidamide |  | -8.8 | ≈ 120 |
| 9. | T9 | 7-[2-hydroxy-3-(4-toluidino)propyl]-1,3-dimethyl-3,7-dihydro-1H-purine-2,6-dione           |  | -8.7 | ≈ 115 |

|     |     |                                                                                                    |                                                                                       |      |       |
|-----|-----|----------------------------------------------------------------------------------------------------|---------------------------------------------------------------------------------------|------|-------|
| 10. | T10 | 2-dibenzo[b,d]thien-4-yl-2-hydroxypropanoic acid                                                   | 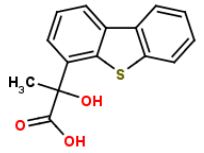   | -8.3 | >150  |
| 11. | T11 | methyl 10,11-dihydro-5H-dibenzo[b,f]azepin-3-ylcarbamate                                           |    | -8.7 | >150  |
| 12. | A1  | 1,9-oxanthrenedisulfonic acid                                                                      |    | -8   | ≈ 120 |
| 13. | A2  | phenanthro[9,10-g]pteridine-11,13(10H,12H)-dione                                                   |    | -9   | >150  |
| 14. | A3  | 5-[cyano(hydroxyimino)methyl]-2'-oxo-1',2,3,3'-tetrahydrospiro[1,3,4-oxadiazole-2,3'-(2'H)-indole] |  | -8.1 | ≈ 95  |
| 15. | A4  | 4-hydroxybenzaldehyde semicarbazone                                                                |  | -7.4 | >150  |

|     |    |                                                                               |                                                                                                                                                                                                                                                                                                                                                                                                                                          |      |      |
|-----|----|-------------------------------------------------------------------------------|------------------------------------------------------------------------------------------------------------------------------------------------------------------------------------------------------------------------------------------------------------------------------------------------------------------------------------------------------------------------------------------------------------------------------------------|------|------|
| 16. | A5 | 4-{2-nitro-1-propenyl}-1,2-benzenediol                                        | 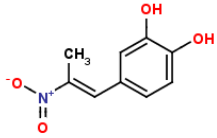 <p>The structure shows a benzene ring with two hydroxyl groups (OH) at the 1 and 2 positions. At the 4 position, there is a propenyl chain with a nitro group (NO<sub>2</sub>) at the 2-position and a methyl group (CH<sub>3</sub>) at the 1-position.</p>                                                                                          | -7.9 | ≈ 8  |
| 17. | A6 | 1-amino-3-(4-pyridinyl)-3H-pyrido[2,1-b][1,3]benzothiazole-2,4-dicarbonitrile |  <p>The structure is a complex polycyclic system. It features a benzothiazole core fused to a pyridine ring. The pyridine ring has a cyano group (C≡N) at the 2-position and a 4-pyridinyl group at the 3-position. The benzothiazole part has an amino group (H<sub>2</sub>N) at the 1-position and cyano groups (C≡N) at the 2 and 4 positions.</p> | -7.4 | >150 |
